# Supplementary material for: Dipeptidyl peptidase-4 inhibitor compared with sulfonylurea in combination with metformin: cardiovascular and renal outcomes in a propensity-matched cohort study
Source: Springer Nature journal article supplement (doi:10.1186/s12933-019-0835-z), 2019-03-11
Supplement: MOESM2 [file 16538450]

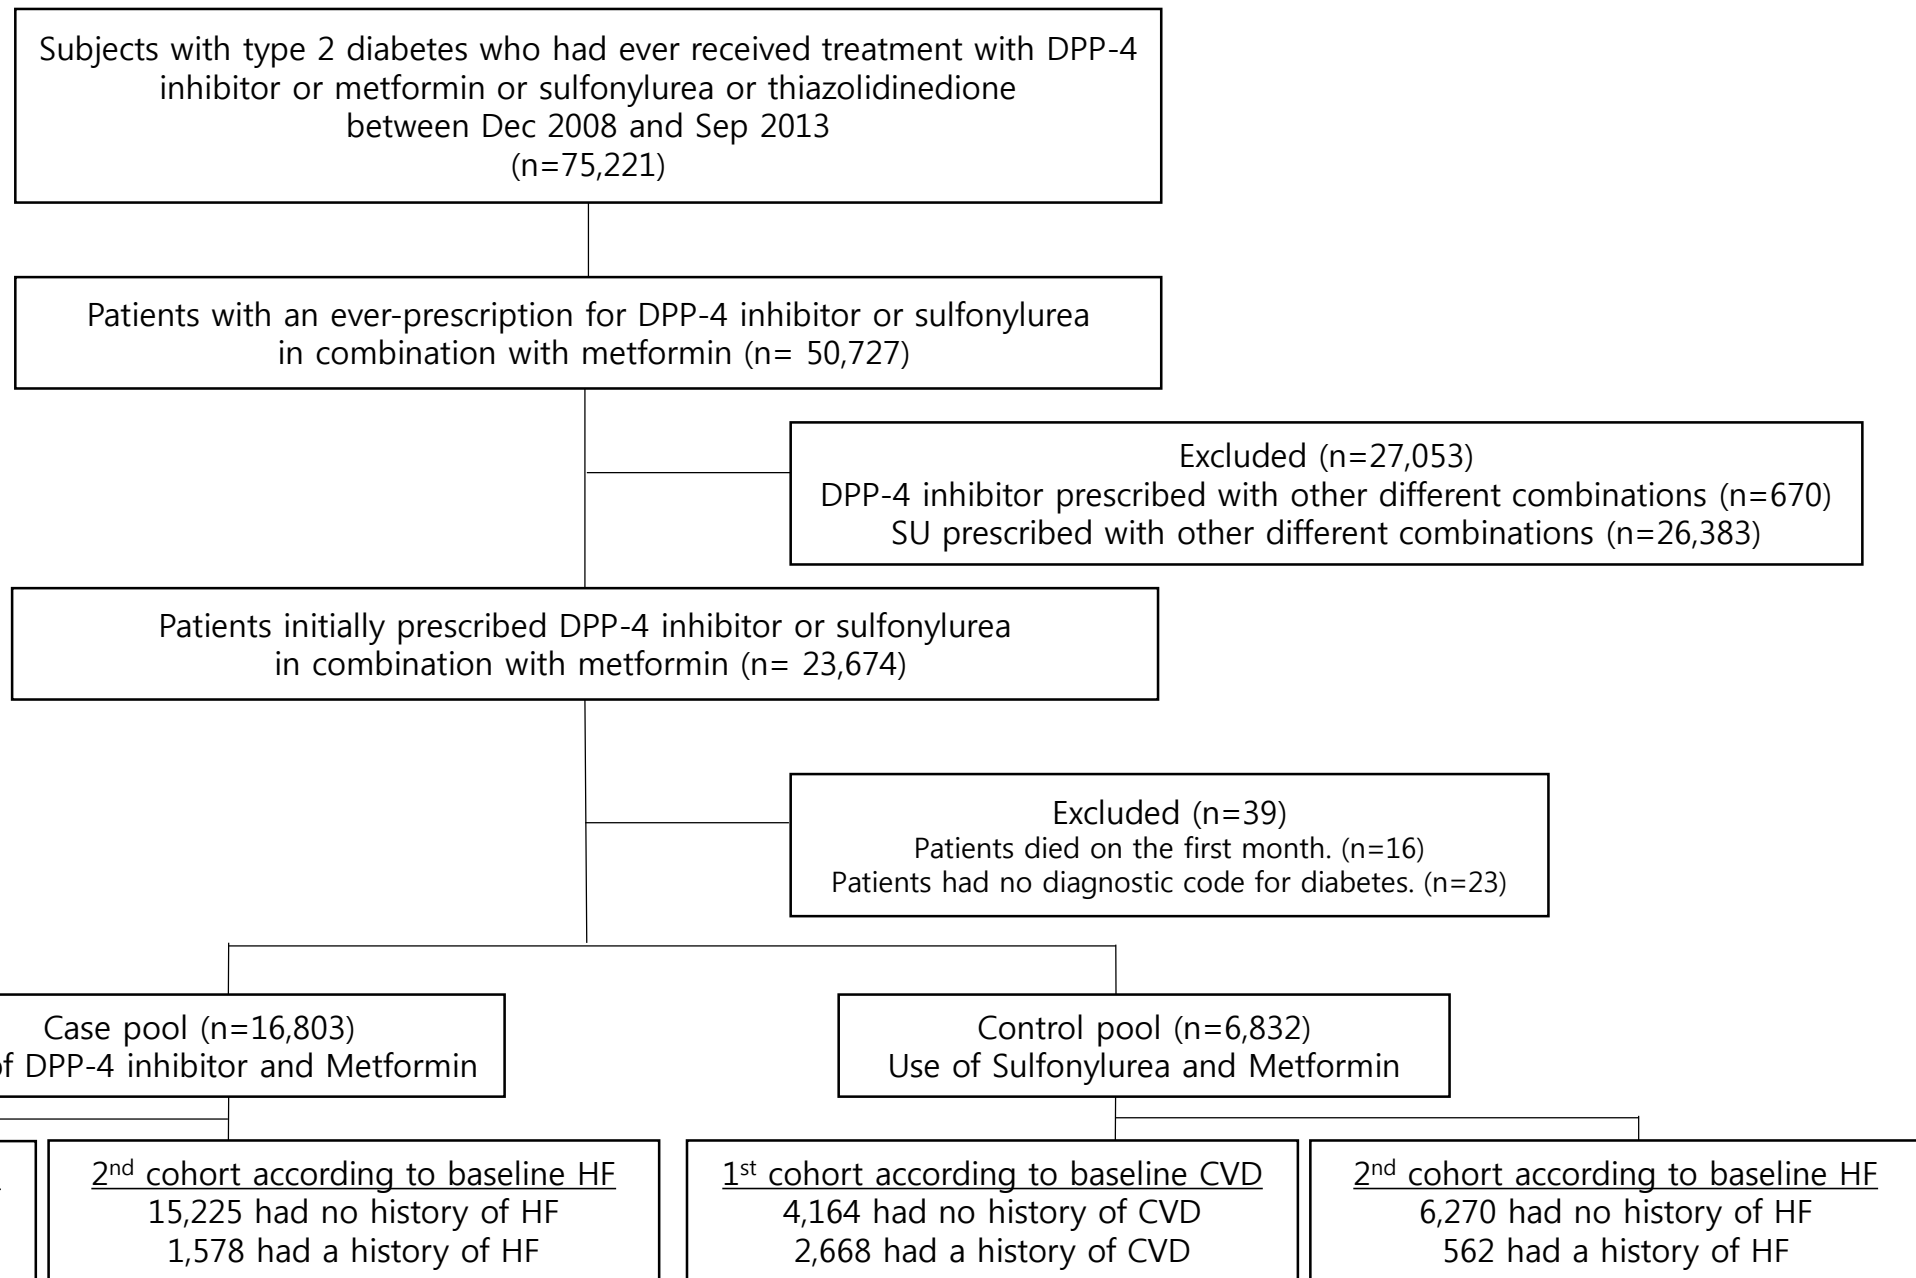

**Figure S1.** Disposition of study subjects

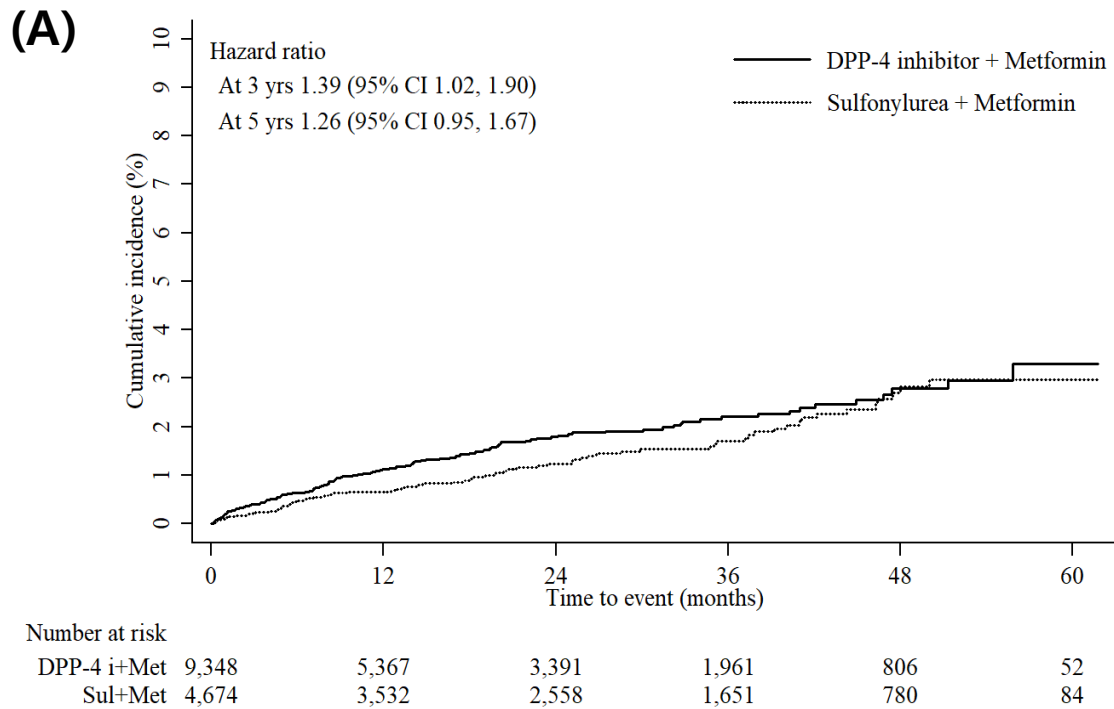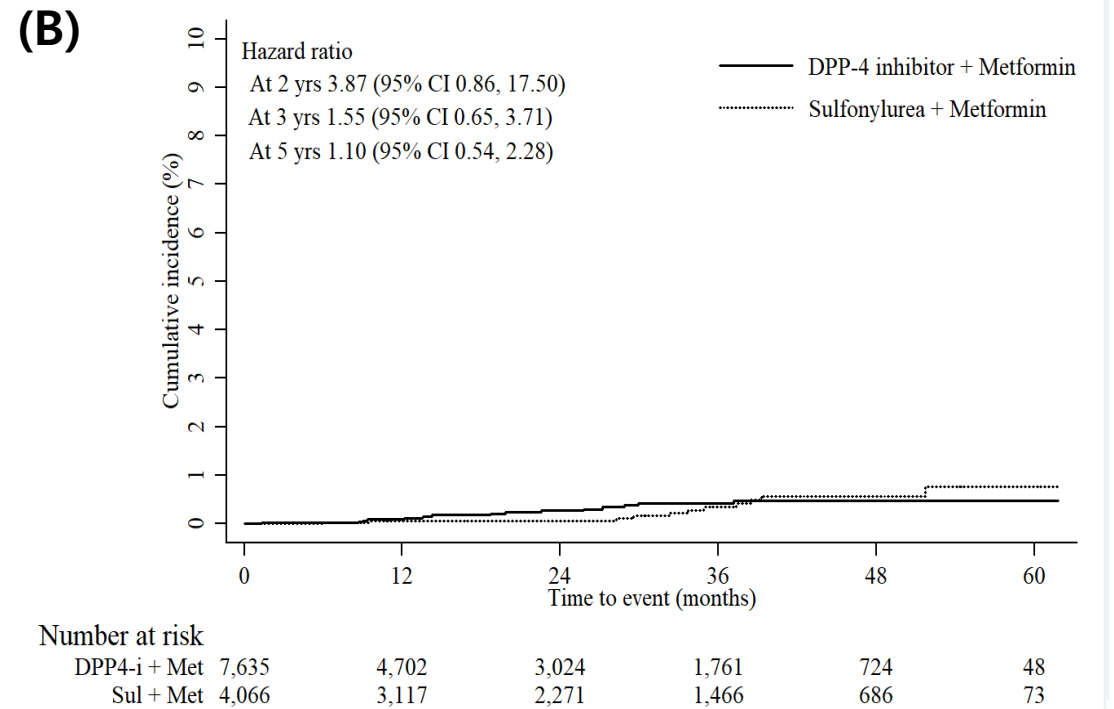

**Figure S2.** Comparison of cumulative incidence for CVD outcomes according to the baseline HF. (A) Incidence of hospitalization for heart failure. (B) Incidence for end-stage renal disease events.
